# Supplementary material
Source: PubMed Central journal article supplement (PMC8818144)

**Fig.S1** The overall three-dimensional (3D) antigenic maps.

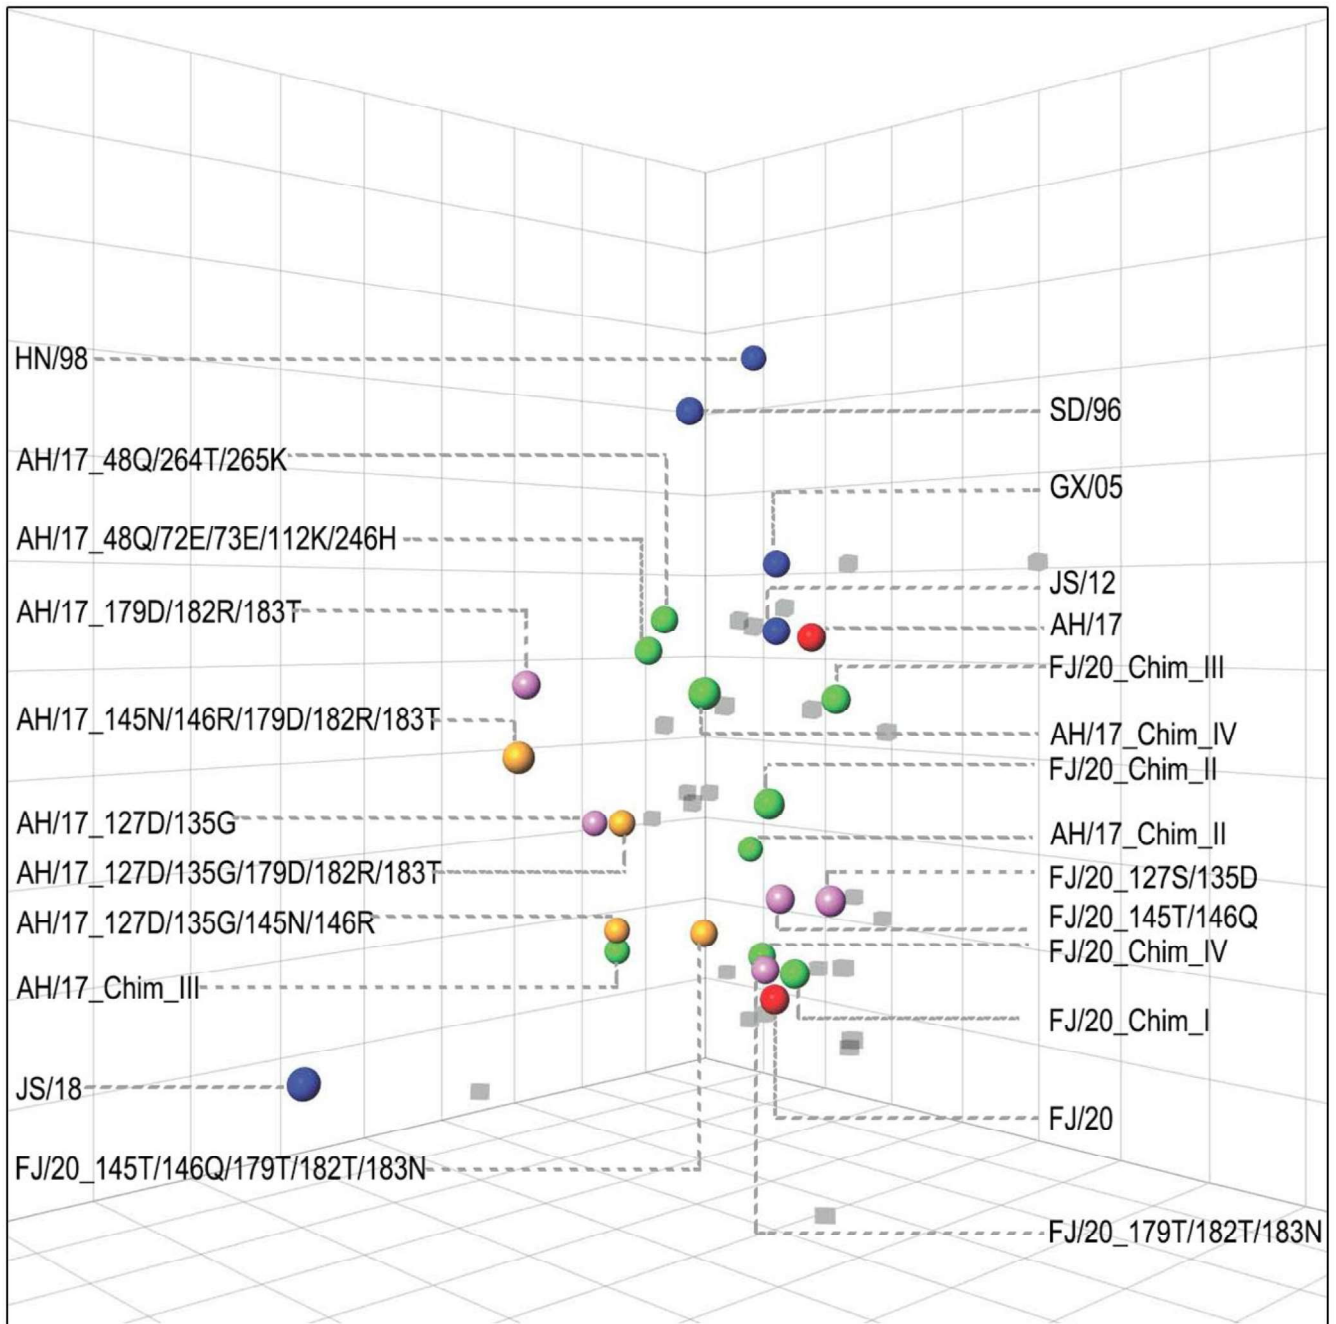

**Fig.S2** The antigenic map of AH/17, AH/17\_127D/135G, AH/17\_127D/135G/146R and AH/20\_127D/135G/145N/146R

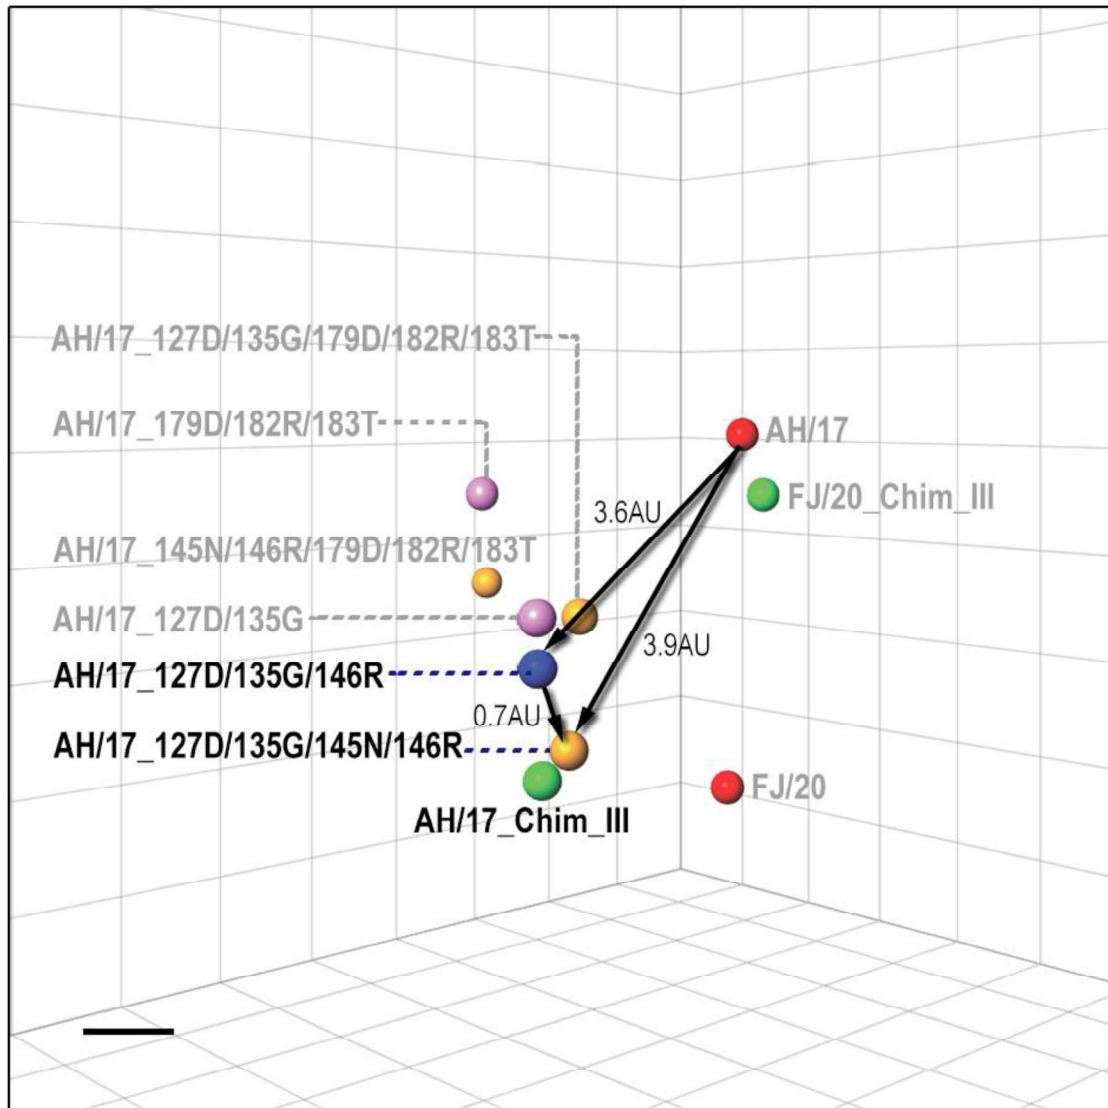

Supplement: 12985_2022_1755_MOESM2_ESM.pdf [file 12985_2022_1755_MOESM2_ESM.pdf]
